# Supplementary material for: Quantification of Immune Variables from Liquid Biopsy in Breast Cancer Patients Links Vδ2+ γδ T Cell Alterations with Lymph Node Invasion
Source: MDPI journal article supplement (doi:10.3390/cancers13030441), 2021-01-25
Supplement: s1 [file s1]

# Quantification of Immune Variables from Liquid Biopsy in Breast Cancer Patients Links $V\delta 2^+$ $\gamma\delta$ T Cell Alterations with Lymph Node Invasion

Stéphane Fattori, Laurent Gorvel, Samuel Granjeaud, Philippe Rochigneux, Marie-Sarah Rouvière, Amira Ben Amara, Nicolas Boucherit, Magali Paul, Marie Mélanie Dauplat, Jeanne Thomassin-Piana, Maria Paciencia-Gros, Morgan Avenin, Julien Barrou, Gilles Houvenaeghel, Emmanuelle Charafe-Jauffret, Eric Lambaudie, François Bertucci, Anthony Goncalves, Carole Tarpin, Jacques A. Nunès, Raynier Devillier, Jihane Pakradouni, Anne-Sophie Chretien and Daniel Olive

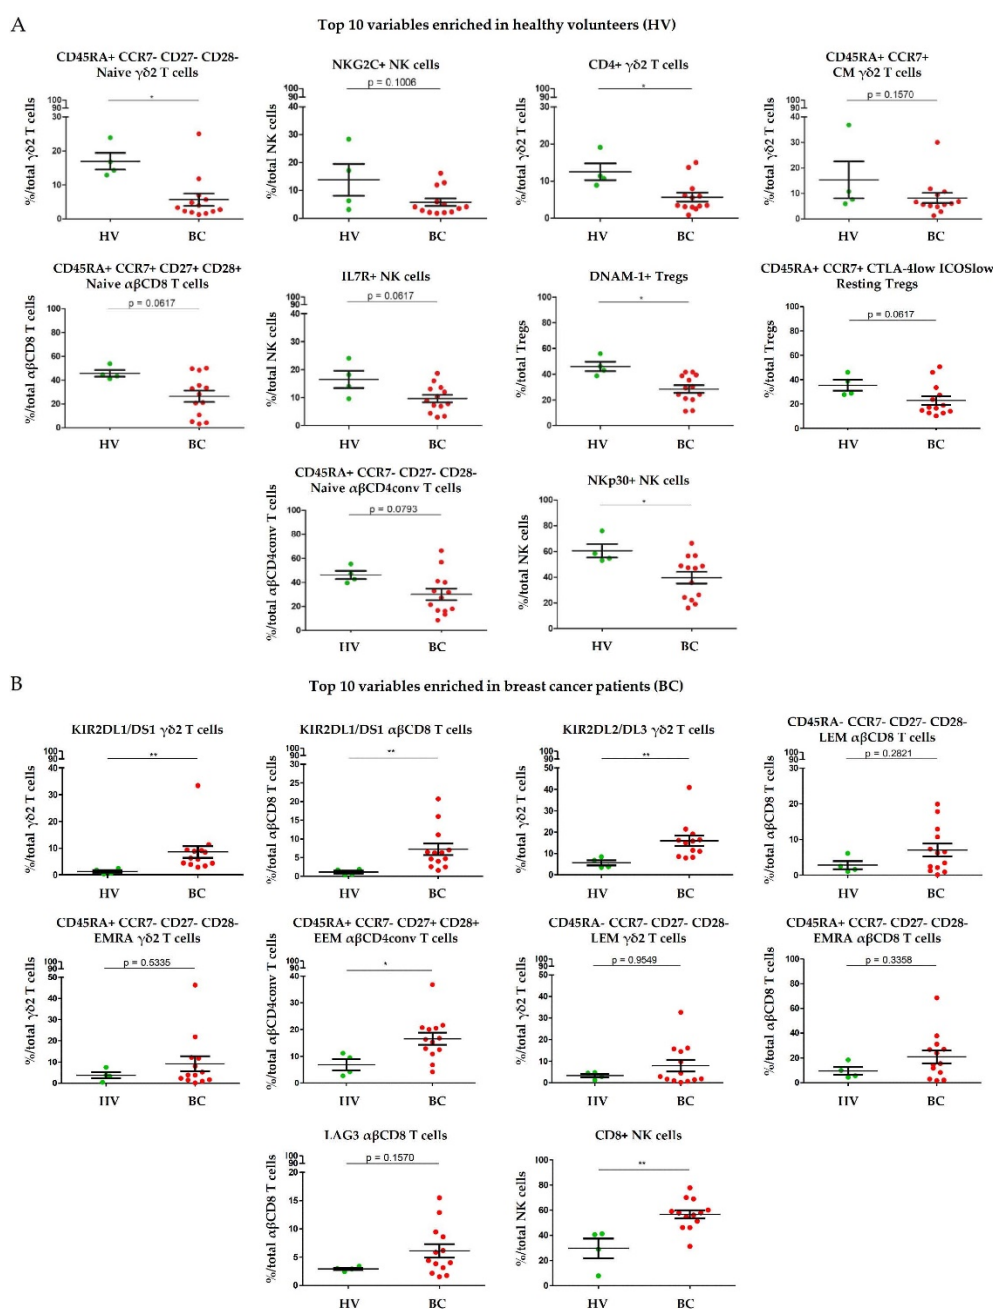

**Figure S1.** Frequency comparison of the top 20 circulating immune variables discriminating HV and BC patients' groups. Data were analyzed using Wilcoxon–Mann–Whitney test, Mean with SEM ; \*,  $P < 0.05$  ; \*\*,  $P < 0.01$ .

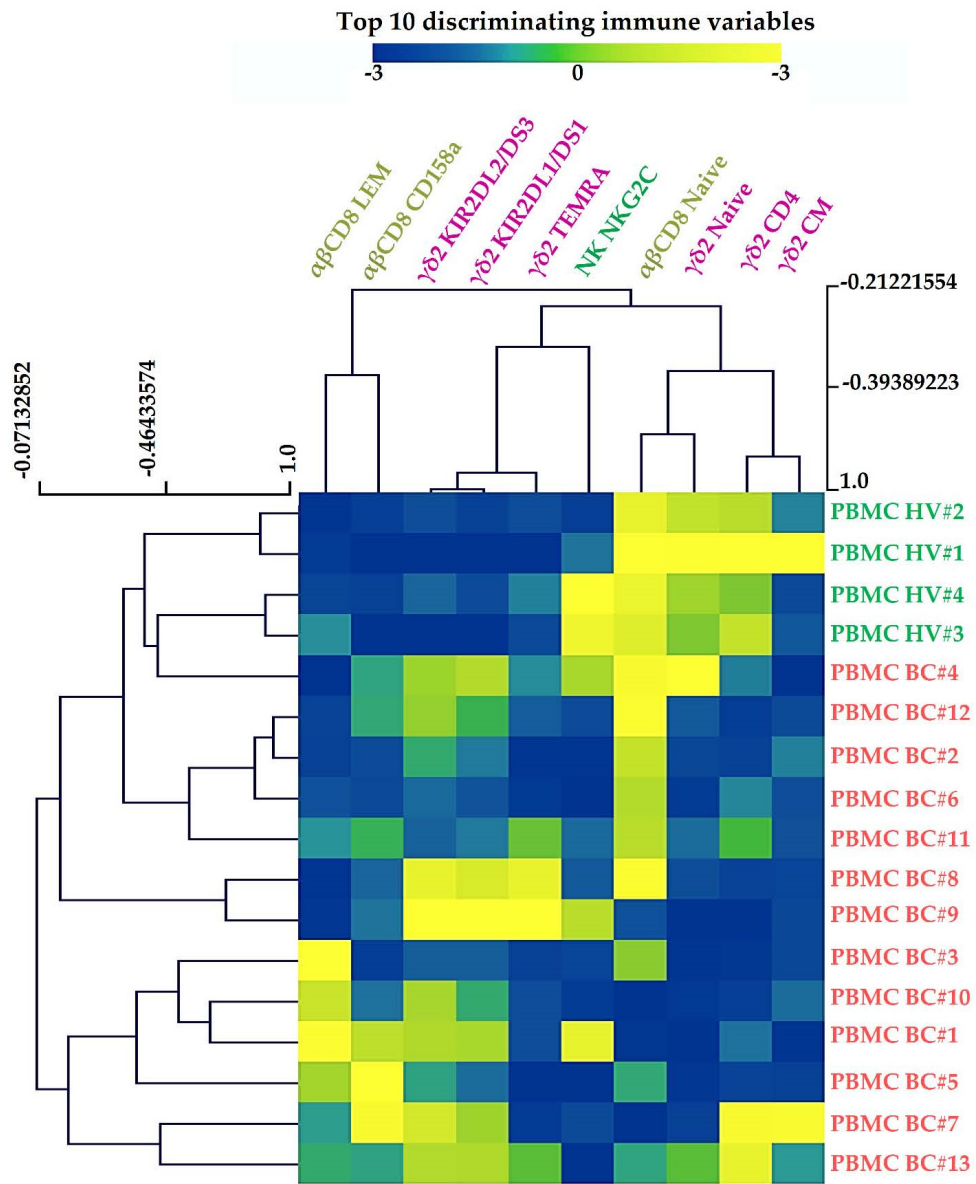

**Figure S2.** Heatmap visualization of samples' hierarchical clustering (Pearson's correlation) based on the normalized top 10 discriminating immune variables.

A

Top 10 variables enriched in breast cancer patients with lymph node invasion (BC N+)

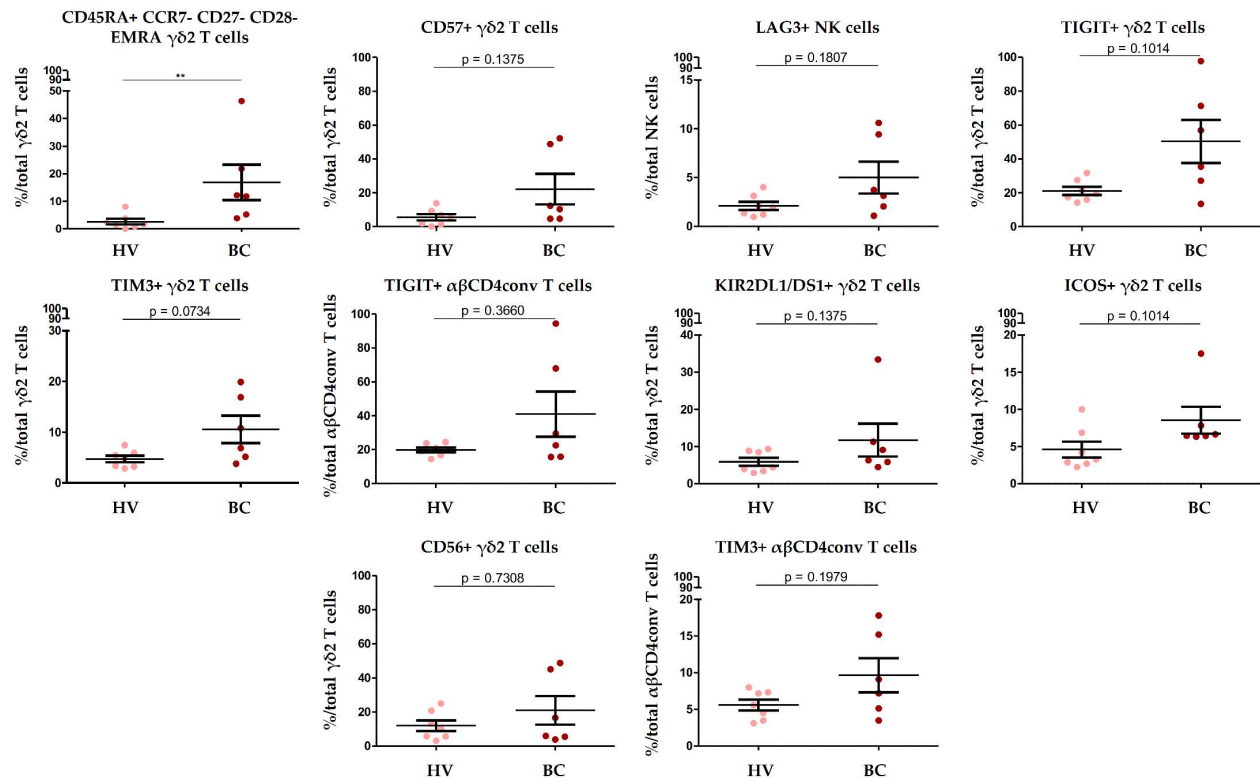

B

Top 10 variables enriched in breast cancer patients without lymph node invasion (BC N-)

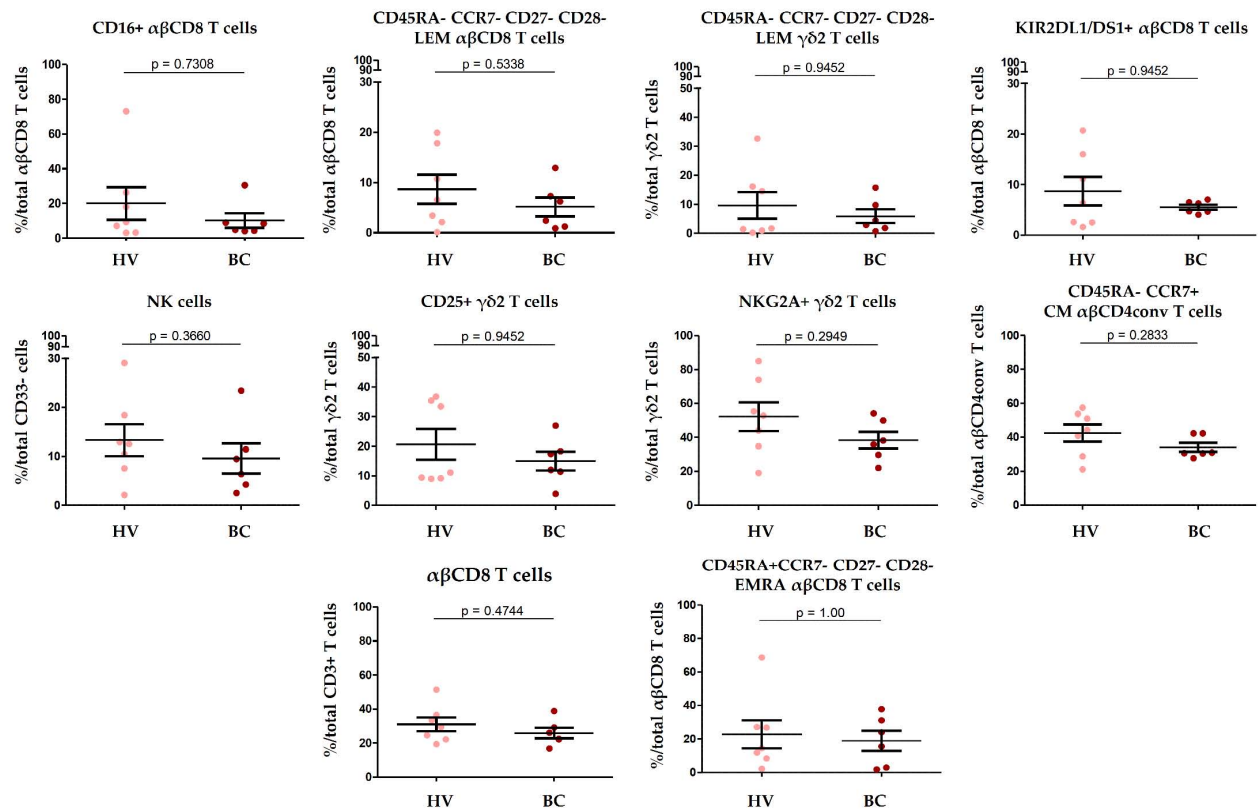

**Figure S3.** Frequency comparison of the top 20 circulating immune variables discriminating BC N- and BC N+ groups. Data were analyzed using Wilcoxon–Mann–Whitney test, Mean with SEM ; \*,  $P < 0.05$  ; \*\*,  $P < 0.01$ .

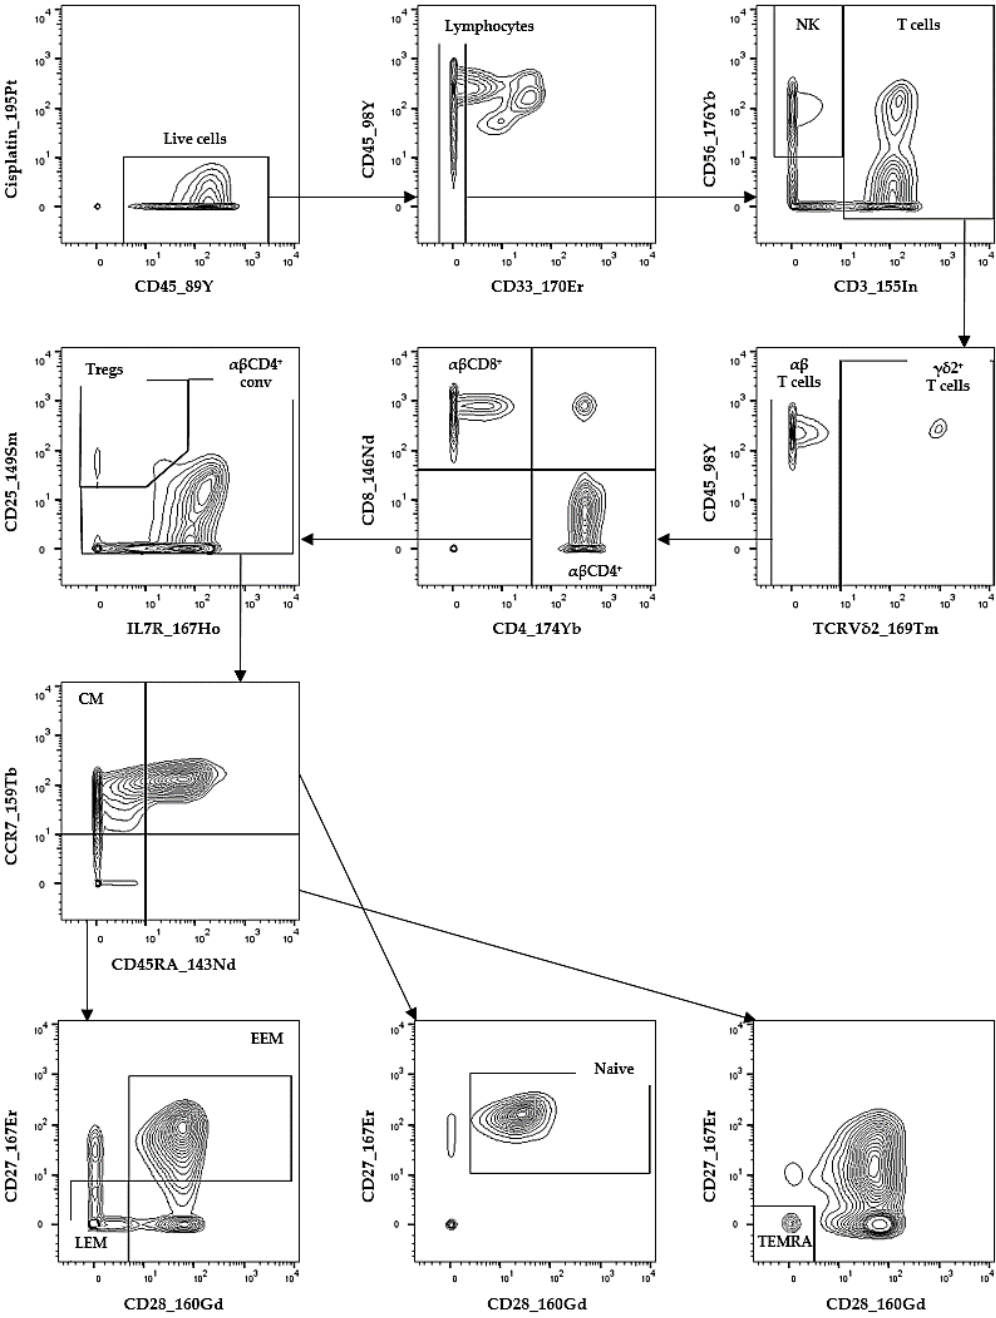

Figure S4. Manual gating strategy of PBMC populations and T cells subpopulations of a representative sample.

Table S1. Mass cytometry panels.

| Panel_1                |     |    |                                               |  |
|------------------------|-----|----|-----------------------------------------------|--|
| Extracellular staining |     |    |                                               |  |
| CD45                   | 89  | Y  | Fluidigm                                      |  |
| CD3                    | 115 | In | Purified : Ozyme/metal labeling kit: Fluidigm |  |
| CD45RA                 | 143 | Nd | Fluidigm                                      |  |
| HVEM                   | 144 | Nd | Fluidigm                                      |  |
| CD8a                   | 146 | Nd | Fluidigm                                      |  |
| CD25                   | 149 | Sm | Fluidigm                                      |  |
| ICOS                   | 151 | Eu | Fluidigm                                      |  |
| TIM-3                  | 153 | Eu | Fluidigm                                      |  |
| TIGIT                  | 154 | Sm | Fluidigm                                      |  |

|                               |     |        |                                               |
|-------------------------------|-----|--------|-----------------------------------------------|
| PD-1                          | 155 | Gd     | Fluidigm                                      |
| PD-L1                         | 156 | Gd     | Fluidigm                                      |
| 4-1BB                         | 158 | Gd     | Fluidigm                                      |
| CCR7                          | 159 | Tb     | Fluidigm                                      |
| CD28                          | 160 | Gd     | Fluidigm                                      |
| BTLA                          | 163 | Dy     | Fluidigm                                      |
| Fas                           | 164 | Dy     | Fluidigm                                      |
| IL-7R                         | 165 | Ho     | Fluidigm                                      |
| CD44                          | 166 | Er     | Fluidigm                                      |
| CD27                          | 167 | Er     | Fluidigm                                      |
| CD69                          | 168 | Er     | Fluidigm                                      |
| TCRVd2                        | 169 | Tm     | Purified : Ozyme/metal labeling kit: Fluidigm |
| DNAM-1                        | 171 | Yb     | Fluidigm                                      |
| CD57                          | 172 | Yb     | Fluidigm                                      |
| CD4                           | 174 | Yb     | Fluidigm                                      |
| LAG3                          | 175 | Lu     | Fluidigm                                      |
| CD56                          | 176 | Yb     | Fluidigm                                      |
| CD16                          | 209 | Bi     | Fluidigm                                      |
| CD33                          |     | biotin | Ozyme                                         |
| <i>Secondary antibody</i>     |     |        |                                               |
| Anti-biotin                   | 170 | Er     | Fluidigm                                      |
| <i>Intracellular Staining</i> |     |        |                                               |
| CTLA-4                        | 161 | Dy     | Fluidigm                                      |
| <b>Panel_2</b>                |     |        |                                               |
| <i>Extracellular staining</i> |     |        |                                               |
| CD45                          | 89  | Y      | Fluidigm                                      |
| CD3                           | 115 | In     | Purified : Ozyme/metal labeling kit: Fluidigm |
| TCRVd2                        | 141 | Pr     | Purified : Ozyme/metal labeling kit: Fluidigm |
| CD19                          | 142 | Nd     | Fluidigm                                      |
| CD45RA                        | 143 | Nd     | Fluidigm                                      |
| CD4                           | 145 | Nd     | Fluidigm                                      |
| CD8                           | 146 | Nd     | Fluidigm                                      |
| NKG2C                         | 152 | Sm     | Fluidigm                                      |
| KIR2DL2/DL3                   | 154 | Sm     | Purified: Ozyme/metal labeling kit: Fluidigm  |
| CD27                          | 155 | Gd     | Fluidigm                                      |
| NKG2D                         | 160 | Gd     | Fluidigm                                      |
| NKp46                         | 162 | Dy     | Fluidigm                                      |
| DNAM-1                        | 164 | Dy     | Fluidigm                                      |
| NKG2A                         | 165 | Ho     | Fluidigm                                      |
| CD96                          | 166 | Er     | Fluidigm                                      |
| KIR2DL1/DS1                   | 168 | Er     | Purified : Ozyme/metal labeling kit: Fluidigm |
| NKp30                         | 169 | Tm     | Fluidigm                                      |
| CD57                          | 172 | Yb     | Fluidigm                                      |
| CD56                          | 176 | Yb     | Fluidigm                                      |
| CD33                          |     | biotin | Ozyme                                         |
| <i>Secondary antibody</i>     |     |        |                                               |
| Anti-biotin                   | 170 | Er     | Fluidigm                                      |

**Table S4.** Patients' baseline clinicopathological characteristics.

| <b>N patients</b>                    | <b>13</b>        |
|--------------------------------------|------------------|
| Sex, n (%)                           | Women, 13 (100%) |
| <b>Age, median (range)</b>           | 63 (35–81) years |
| <b>Tumor type</b>                    |                  |
| ductal, n (%)                        | 11 (85)          |
| lobular, n (%)                       | 2 (15)           |
| <b>Clinical tumor stage</b>          |                  |
| pT1a <sup>1</sup> , n (%)            | 1 (8)            |
| pT1b <sup>2</sup> , n (%)            | 1 (8)            |
| pT1c <sup>3</sup> , n (%)            | 7 (54)           |
| pT2 <sup>4</sup> , n (%)             | 4 (30)           |
| pT3 <sup>5</sup> , n (%)             | 0 (0)            |
| pT4 <sup>6</sup> , n (%)             | 0 (0)            |
| <b>Histological grade</b>            |                  |
| G I, n (%)                           | 3 (23)           |
| G II, n (%)                          | 6 (46)           |
| G III, n (%)                         | 4 (31)           |
| <b>Lymph node invasion</b>           |                  |
| N+                                   | 6 (46)           |
| N-                                   | 7 (54)           |
| <b>ER/PR/HER2 status (IHC)</b>       |                  |
| H+, n (%)                            | 10 (77)          |
| H-, n (%)                            | 3 (23)           |
| HER2+, n (%)                         | 6 (46)           |
| HER2-, n (%)                         | 7 (54)           |
| Triple negative, n (%)               | 3 (21)           |
| Ki-67 0–19% of positive cells, n (%) | 6 (46)           |
| Ki-67 > 20% of positive cells, n (%) | 7 (54)           |

<sup>1</sup> tumor 0.1–0.5 cm; <sup>2</sup> tumor 0.5–1.0 cm; <sup>3</sup> tumor 1.0–2.0 cm; <sup>4</sup> tumor 2.0–5.0 cm; <sup>5</sup> tumor > 5 cm; <sup>6</sup> invasion to chest/skin/inflammatory BC; N+, positive lymphatic nodes; N-, negative lymphatic nodes; ER, estrogen receptors; PR, progesterone receptors; HER2, human epidermal growth factor receptor 2; H, hormone receptors; H+, positive for hormonal receptors; HER-, negative for hormonal receptors; HER2+, positive for HER2; HER2-, negative for HER2; triple negative, negative for H and HER2.
